# Supplementary material
Source: Springer Nature journal article supplement (https://www.springermedizin.de/resource/supplementary/12874_2005_142_MOESM3_ESM.pdf/9433854)

| Number of clusters in each arm (g) | $\tau$ | Intraclass correlation coefficient $\rho=0.005$ |      |      |      |      |      |      |      |      | Intraclass correlation coefficient $\rho=0.02$ |     |     |     |     |     |     |     |     |     |
|------------------------------------|--------|-------------------------------------------------|------|------|------|------|------|------|------|------|------------------------------------------------|-----|-----|-----|-----|-----|-----|-----|-----|-----|
|                                    |        | $\gamma$                                        | 0.1  | 0.2  | 0.3  | 0.4  | 0.5  | 0.6  | 0.7  | 0.8  | 0.9                                            | 0.1 | 0.2 | 0.3 | 0.4 | 0.5 | 0.6 | 0.7 | 0.8 | 0.9 |
| 5                                  | 0.1    |                                                 | 0.80 |      |      |      |      |      |      |      |                                                |     |     |     |     |     |     |     |     |     |
|                                    | 0.2    |                                                 | 0.79 | 0.80 |      |      |      |      |      |      |                                                |     |     |     |     |     |     |     |     |     |
|                                    | 0.3    |                                                 | 0.77 | 0.79 | 0.80 |      |      |      |      |      |                                                |     |     |     |     |     |     |     |     |     |
|                                    | 0.4    |                                                 | 0.75 | 0.78 | 0.80 | 0.80 |      |      |      |      |                                                |     |     |     |     |     |     |     |     |     |
|                                    | 0.5    |                                                 | 0.71 | 0.76 | 0.79 | 0.80 | 0.80 |      |      |      |                                                |     |     |     |     |     |     |     |     |     |
|                                    | 0.6    |                                                 | 0.66 | 0.73 | 0.77 | 0.79 | 0.80 | 0.80 |      |      |                                                |     |     |     |     |     |     |     |     |     |
|                                    | 0.7    |                                                 | 0.60 | 0.69 | 0.74 | 0.77 | 0.79 | 0.80 | 0.80 |      |                                                |     |     |     |     |     |     |     |     |     |
|                                    | 0.8    |                                                 | 0.52 | 0.63 | 0.70 | 0.74 | 0.77 | 0.78 | 0.80 | 0.80 |                                                |     |     |     |     |     |     |     |     |     |
|                                    | 0.9    |                                                 | 0.42 | 0.56 | 0.64 | 0.70 | 0.73 | 0.76 | 0.78 | 0.79 | 0.80                                           |     |     |     |     |     |     |     |     |     |
| 10                                 | 0.1    |                                                 | 0.80 |      |      |      |      |      |      |      |                                                |     |     |     |     |     |     |     |     |     |
|                                    | 0.2    |                                                 | 0.80 | 0.80 |      |      |      |      |      |      |                                                |     |     |     |     |     |     |     |     |     |
|                                    | 0.3    |                                                 | 0.79 | 0.80 | 0.80 |      |      |      |      |      |                                                |     |     |     |     |     |     |     |     |     |
|                                    | 0.4    |                                                 | 0.77 | 0.79 | 0.80 | 0.80 |      |      |      |      |                                                |     |     |     |     |     |     |     |     |     |
|                                    | 0.5    |                                                 | 0.77 | 0.78 | 0.79 | 0.80 | 0.80 |      |      |      |                                                |     |     |     |     |     |     |     |     |     |
|                                    | 0.6    |                                                 | 0.75 | 0.77 | 0.78 | 0.79 | 0.80 | 0.80 |      |      |                                                |     |     |     |     |     |     |     |     |     |
|                                    | 0.7    |                                                 | 0.72 | 0.74 | 0.77 | 0.78 | 0.79 | 0.80 | 0.80 |      |                                                |     |     |     |     |     |     |     |     |     |
|                                    | 0.8    |                                                 | 0.66 | 0.70 | 0.73 | 0.76 | 0.78 | 0.79 | 0.80 | 0.80 |                                                |     |     |     |     |     |     |     |     |     |
|                                    | 0.9    |                                                 | 0.54 | 0.60 | 0.66 | 0.70 | 0.74 | 0.76 | 0.78 | 0.80 | 0.80                                           |     |     |     |     |     |     |     |     |     |
| 20                                 | 0.1    |                                                 | 0.80 |      |      |      |      |      |      |      |                                                |     |     |     |     |     |     |     |     |     |
|                                    | 0.2    |                                                 | 0.80 | 0.80 |      |      |      |      |      |      |                                                |     |     |     |     |     |     |     |     |     |
|                                    | 0.3    |                                                 | 0.80 | 0.80 | 0.80 |      |      |      |      |      |                                                |     |     |     |     |     |     |     |     |     |
|                                    | 0.4    |                                                 | 0.79 | 0.80 | 0.80 | 0.80 |      |      |      |      |                                                |     |     |     |     |     |     |     |     |     |
|                                    | 0.5    |                                                 | 0.77 | 0.79 | 0.80 | 0.80 | 0.80 |      |      |      |                                                |     |     |     |     |     |     |     |     |     |
|                                    | 0.6    |                                                 | 0.76 | 0.78 | 0.79 | 0.80 | 0.80 | 0.80 |      |      |                                                |     |     |     |     |     |     |     |     |     |
|                                    | 0.7    |                                                 | 0.74 | 0.77 | 0.78 | 0.79 | 0.80 | 0.80 | 0.80 |      |                                                |     |     |     |     |     |     |     |     |     |
|                                    | 0.8    |                                                 | 0.73 | 0.75 | 0.76 | 0.78 | 0.79 | 0.79 | 0.80 | 0.80 |                                                |     |     |     |     |     |     |     |     |     |
|                                    | 0.9    |                                                 | 0.65 | 0.68 | 0.72 | 0.74 | 0.76 | 0.78 | 0.79 | 0.88 | 0.80                                           |     |     |     |     |     |     |     |     |     |
| 40                                 | 0.1    |                                                 | 0.80 |      |      |      |      |      |      |      |                                                |     |     |     |     |     |     |     |     |     |
|                                    | 0.2    |                                                 | 0.80 | 0.80 |      |      |      |      |      |      |                                                |     |     |     |     |     |     |     |     |     |
|                                    | 0.3    |                                                 | 0.80 | 0.80 | 0.80 |      |      |      |      |      |                                                |     |     |     |     |     |     |     |     |     |
|                                    | 0.4    |                                                 | 0.80 | 0.80 | 0.80 | 0.80 |      |      |      |      |                                                |     |     |     |     |     |     |     |     |     |
|                                    | 0.5    |                                                 | 0.79 | 0.80 | 0.80 | 0.80 | 0.80 |      |      |      |                                                |     |     |     |     |     |     |     |     |     |
|                                    | 0.6    |                                                 | 0.79 | 0.79 | 0.80 | 0.80 | 0.80 | 0.80 |      |      |                                                |     |     |     |     |     |     |     |     |     |
|                                    | 0.7    |                                                 | 0.78 | 0.79 | 0.79 | 0.80 | 0.80 | 0.80 | 0.80 |      |                                                |     |     |     |     |     |     |     |     |     |
|                                    | 0.8    |                                                 | 0.76 | 0.77 | 0.78 | 0.79 | 0.79 | 0.80 | 0.80 | 0.80 |                                                |     |     |     |     |     |     |     |     |     |
|                                    | 0.9    |                                                 | 0.72 | 0.74 | 0.75 | 0.77 | 0.78 | 0.79 | 0.80 | 0.80 | 0.80                                           |     |     |     |     |     |     |     |     |     |

Non reachable 80% power

$\gamma$  is the proportion of big clusters and  $\tau$  the proportion of patients in big clusters

The effect size to be detected was fixed at 0.25, the nominal values for type I and type II error rates were fixed at 0.05 and 0.20, respectively.

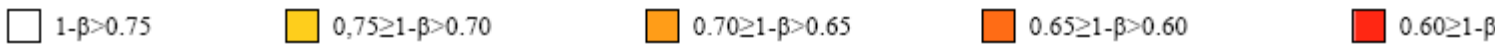

Supplement: MOESM3 [file 9433854]
